# Supplementary material for: A comprehensive transcriptome analysis of skeletal muscles in two Polish pig breeds differing in fat and meat quality traits
Source: PubMed Central journal article supplement (PMC5901489; doi:10.1590/1678-4685-gmb-2016-0101), 2018
Supplement: 1415-4757-GMB-41-01-2016-0101-s001.pdf [file 1415-4757-GMB-41-01-2016-0101-s001.pdf]

## Supplementary Material to “A comprehensive transcriptome analysis of skeletal muscles in two Polish pig breeds differing in fat and meat quality traits”

**Table S1** - Overall statistics and read annotations obtained for each library.

| Sample                             | PULS1        | PULS2       | PULS3       | PULS4       | PULS5       | PULS6       | PULS7       | PULS8       |
|------------------------------------|--------------|-------------|-------------|-------------|-------------|-------------|-------------|-------------|
| Indexes/pooling (lane)             | AR005/lane2* | AR009/lane2 | AR011/lane2 | AR015/lane2 | AR022/lane2 | AR025/lane2 | AR012/lane2 | AR014/lane2 |
| Remaining reads %                  | 99.0         | 99.2        | 99.2        | 99.1        | 99.0        | 99.3        | 99.4        | 99.2        |
| Exonic rate                        | 63.2         | 66.3        | 69.1        | 66.2        | 66.2        | 65.1        | 66.2        | 69.4        |
| Intronic rate                      | 8.1          | 7.5         | 5.9         | 7.6         | 9.3         | 7.8         | 8.3         | 6.3         |
| Base mismatch rate                 | 0.42         | 0.40        | 0.47        | 0.49        | 0.41        | 0.47        | 0.47        | 0.46        |
| Uniquely mapped reads %            | 82.43        | 83.07       | 79.44       | 81.28       | 84.01       | 79.82       | 81.45       | 79.14       |
| % of reads mapped to multiple loci | 7.68         | 8.19        | 8.05        | 7.48        | 7.82        | 6.89        | 6.61        | 7.07        |
| Sample                             | PULL1        | PULL2       | PULL3       | PULL4       | PULL5       | PULL6       | PULL7       | PULL8       |
| Indexes/pooling (lane)             | AR005/lane1* | AR009/lane1 | AR011/lane1 | AR015/lane1 | AR022/lane1 | AR025/lane1 | AR012/lane1 | AR014/lane1 |
| Remaining reads %                  | 99.3         | 99.3        | 99.3        | 99.3        | 99.3        | 99.1        | 99.2        | 99.2        |
| Exonic rate %                      | 63.4         | 63.0        | 68.6        | 65.7        | 68.4        | 63.0        | 66.6        | 66.3        |
| Intronic rate %                    | 9.9          | 9.3         | 6.5         | 8.6         | 6.9         | 8.2         | 8.7         | 7.5         |
| Base mismatch rate %               | 0.31         | 0.35        | 0.34        | 0.37        | 0.42        | 0.39        | 0.42        | 0.34        |
| Uniquely mapped reads %            | 83.6         | 83.3        | 80.8        | 82.9        | 79.9        | 76.7        | 80.8        | 82.0        |
| % of reads mapped to multiple loci | 9.3          | 8.6         | 7.7         | 7.6         | 8.4         | 7.0         | 7.7         | 6.8         |
| Sample                             | PLL1         | PLL2        | PLL3        | PLL4        | PLL5        | PLL6        | PLL7        | PLL8        |
| Indexes/pooling (lane)             | AR006/lane1* | AR007/lane1 | AR008/lane1 | AR010/lane1 | AR020/lane1 | AR027/lane1 | AR016/lane1 | AR023/lane1 |
| Remaining reads %                  | 99.3         | 99.0        | 99.3        | 99.3        | 99.3        | 99.1        | 99.2        | 99.2        |
| Exonic rate %                      | 66.3         | 60.7        | 64.1        | 65.1        | 67.6        | 70.2        | 65.5        | 63.7        |
| Intronic rate %                    | 8.0          | 10.3        | 8.7         | 7.5         | 7.5         | 7.3         | 8.4         | 7.8         |
| Base mismatch rate %               | 0.41         | 0.54        | 0.44        | 0.50        | 0.43        | 0.57        | 0.42        | 0.43        |
| Uniquely mapped reads %            | 83.5         | 67.6        | 82.8        | 80.6        | 83.5        | 73.1        | 82.6        | 82.9        |
| % of reads mapped to multiple loci | 7.8          | 6.7         | 7.5         | 7.6         | 7.05        | 8.8         | 7.1         | 7.0         |
| Sample                             | PLS1         | PLS2        | PLS3        | PLS4        | PLS5        | PLS6        | PLS7        | PLS8        |
| Indexes/pooling (lane)             | AR006/lane2* | AR007/lane2 | AR008/lane2 | AR010/lane2 | AR020/lane2 | AR027/lane2 | AR016/lane2 | AR023/lane2 |

| Sample                             | PLS1 | PLS2 | PLS3 | PLS4 | PLS5 | PLS6 | PLS7 | PLS8 |
|------------------------------------|------|------|------|------|------|------|------|------|
| Remaining reads %                  | 99.3 | 99.3 | 99.3 | 99.3 | 99.2 | 99.1 | 99.3 | 98.9 |
| Exonic rate %                      | 66.9 | 66.6 | 67.2 | 67.9 | 70.4 | 67.3 | 66.6 | 64.7 |
| Intronic rate %                    | 6.9  | 8.2  | 6.9  | 6.3  | 7.1  | 6.5  | 9.4  | 7.4  |
| Base mismatch rate %               | 0.40 | 0.38 | 0.40 | 0.39 | 0.47 | 0.40 | 0.37 | 0.35 |
| Uniquely mapped reads %            | 81.1 | 81.3 | 81.6 | 83.6 | 79.4 | 82.1 | 82.4 | 81.2 |
| % of reads mapped to multiple loci | 7.01 | 7.7  | 7.3  | 7.2  | 8.2  | 7.03 | 7.52 | 7.43 |

Abbreviation: PULS and PLS – ham (semimembranosus) samples of Puławska and Polish Landrace pigs, PULL and PLL loin (longissimus dorsi) samples of Puławska and Polish Landrace pigs, \* All loin samples were analysed on in four technical replicates in 1,3,5,7 lanes; in turn loin samples in 2, 4, 6,8 lanes
