# Supplementary material for: A comprehensive transcriptome analysis of skeletal muscles in two Polish pig breeds differing in fat and meat quality traits
Source: PubMed Central journal article supplement (PMC5901489; doi:10.1590/1678-4685-gmb-2016-0101), 2018
Supplement: 1415-4757-GMB-41-01-2016-0101-s002.pdf [file 1415-4757-GMB-41-01-2016-0101-s002.pdf]

## Supplementary Material to “A comprehensive transcriptome analysis of skeletal muscles in two Polish pig breeds differing in fat and meat quality traits”

**Table S2** - Primer and TaqMan probes used in validation.

| Gene           |                                                                   | Primers and Probe<br>or<br>Taqman Gene Expression Assay ID | Amplicon<br>length<br>[bp] | Label    | Reference sequences<br>accession numbers | Exon Boundary |
|----------------|-------------------------------------------------------------------|------------------------------------------------------------|----------------------------|----------|------------------------------------------|---------------|
| <i>PPP1R11</i> | protein phosphatase 1 regulatory inhibitor subunit 11             | Ss03390641_m1                                              | 73                         | FAM      | NM_001123166.1                           | 1-2           |
|                |                                                                   | Ss03390642_g1                                              | 72                         | FAM      | NM_001123166                             | 2-3           |
|                |                                                                   | TCACTGAGACAACGGTTACC                                       | 95                         | EvaGreen | ENSSSCG00000028347                       | 2-3           |
|                |                                                                   | GGAAGGTCCCAGCAAATCTTC                                      |                            |          |                                          |               |
|                |                                                                   | CGGAAGCCAGAGAAAAGGT                                        | 159                        | EvaGreen | ENSSSCG00000028347                       | 3-4           |
|                | TATGACCACAGCCCTCCTCT                                              |                                                            |                            |          |                                          |               |
| <i>UCHL1</i>   | ubiquitin carboxyl-terminal esterase L1 (ubiquitin thiolesterase) | Ss03381306_u1                                              | 131                        | FAM      | NM_213763                                | 2-3           |
| <i>HES1</i>    | hes family bHLH transcription factor 1                            | Ss04321631_g1                                              | 75                         | FAM      | BX930390.1                               | 2-3           |
| <i>MAOB</i>    | monoamine oxidase B                                               | Ss03378378_u1                                              | 74                         | VIC      | NM_001195231                             | 15-15         |
| <i>SFRP2</i>   | secreted frizzled-related protein 2                               | Ss04327215_m1                                              | 99                         | VIC      | NM_001244395.1                           | 1-2           |
| <i>VCAN</i>    | versican                                                          | Ss04323138_m1                                              | 67                         | VIC      | NM_001206429.1                           | 3-4           |
| <i>HP</i>      | haptoglobin                                                       | Ss03393371_u1                                              | 90                         | FAM      | NM_214000.2                              | 5-5           |
| <i>OAS2</i>    | 2'-5'-oligoadenylate synthetase 2, 69/71kDa                       | Ss03392009_m1                                              | 65                         | FAM      | NM_213577.1                              | 4-5           |
| <i>PVALB</i>   | parvalbumin                                                       | Ss04247063_m1                                              | 86                         | FAM      | NM_001190157.1                           | 3-4           |
| <i>GPX3</i>    | glutathione peroxidase 3 (plasma)                                 | Ss03387487_u1                                              | 80                         | FAM      | NM_001115155.1                           | 5-5           |
| <i>CNN1</i>    | calponin 1, basic, smooth muscle                                  | Ss03392449_g1                                              | 83                         | VIC      | NM_213878.1                              | 4-5           |
| <i>ASS1</i>    | argininosuccinate synthase 1                                      | Ss03373750_m1                                              | 65                         | VIC      | AK232885.1                               | 12-13         |
| <i>APOD</i>    | Apolipoprotein D                                                  | CTCCTTGGAGTGGCTGAGG                                        | 152                        | EvaGreen | ENSSSCG00000011831                       | 2-3           |
|                |                                                                   | GCTTGGATGCAACTTCCTT                                        |                            |          |                                          |               |

| Gene                |                                                                | Primers and Probe<br>or<br>Taqman Gene Expression Assay<br>ID         | Amplicon<br>length<br>[bp] | Label    | Reference sequences<br>accession numbers | Exon Boundary |
|---------------------|----------------------------------------------------------------|-----------------------------------------------------------------------|----------------------------|----------|------------------------------------------|---------------|
| <i>PEX11G</i>       | Peroxisomal biogenesis factor 11 gamma                         | CCAGCTCTACTACCCCTGTG<br>CGTCTCAGCTTCAGGACCAT                          | 158                        | EvaGreen | ENSSSCG00000013569                       | 2-3           |
| <i>LIMK1</i>        | LIM domain kinase 1                                            | TGCAAGAAGGACTACTGGGC<br>CCAGAGTGTAGGTGTCCCC                           | 165                        | EvaGreen | ENSSSCG00000030378                       | 2-3           |
| <i>LXRA (NR1H3)</i> | nuclear receptor subfamily 1, group H, member 3                | Ss03389237_g1                                                         | 101                        | VIC      | NM_001101814.1                           | 5-6           |
| <i>LIPE</i>         | lipase E, hormone sensitive type                               | Ss03383966_u1                                                         | 96                         | FAM      | NM_214315.1                              | 9-9           |
| <i>OAZ1</i>         | ornithine decarboxylase antizyme 1<br><b>housekeeping gene</b> | Ss03387505_u1                                                         | 77                         | VIC      | NM_001122994.1                           | 5-5           |
| <i>RPL27</i>        | 60S ribosomal protein L27<br><b>housekeeping gene</b>          | 5`NED - CGGTCATCGTAAAGAA<br>CGTACTCCGGACGCAAA<br>GGTCTGAGGTGCCATCATCA | 55                         | NED      | ENSSSCG00000025507                       | 1-2           |
