# Supplementary material for: A comprehensive transcriptome analysis of skeletal muscles in two Polish pig breeds differing in fat and meat quality traits
Source: PubMed Central journal article supplement (PMC5901489; doi:10.1590/1678-4685-gmb-2016-0101), 2018
Supplement: 1415-4757-GMB-41-01-2016-0101-s003.pdf [file 1415-4757-GMB-41-01-2016-0101-s003.pdf]

## Supplementary Material to “A comprehensive transcriptome analysis of skeletal muscles in two Polish pig breeds differing in fat and meat quality traits”

**Table S3.** – Genes  $\geq \pm 1.5$ - fold (up-regulated and down-regulated) differentially expressed in *semimembranosus* muscle of Polish Landrace pigs.

| Gene           |                                                           | Ensemble ID        | DESeq |            | edgeR |       | baySeq<br>FDR | Validation qPCR<br>PC <sup>1</sup> |              |
|----------------|-----------------------------------------------------------|--------------------|-------|------------|-------|-------|---------------|------------------------------------|--------------|
| symbol         | name                                                      |                    | FC    | Ad p-value | FC    | FDR   |               | r                                  | P            |
| <i>PPP1R11</i> | Protein phosphatase 1, regulatory (inhibitor) subunit 11  | ENSSSCG00000028347 | 2.75  | ***        | 6.16  | ***   | ***           | 0.63                               | $\leq 0.05$  |
| <i>NG</i>      | Similar to E3 ubiquitin-protein ligase ( HECTD2)          | ENSSSCG00000020912 | 2.01  | **         | 2.49  | *     | **            |                                    |              |
| <i>PCDH17</i>  | Protocadherin 17                                          | ENSSSCG00000009446 | 2.00  | **         | 2.45  | **    | ***           |                                    |              |
| <i>NG</i>      | Similar to Nik related kinase (NRK)                       | ENSSSCG00000030276 | 1.98  | *          | 2.83  | *     | **            |                                    |              |
| <i>HES1</i>    | Hairy and enhancer of split 1                             | ENSSSCG00000026362 | 1.95  | **         | 2.47  | *     | **            | 0.91                               | $\leq 0.001$ |
| <i>SFRP2</i>   | Secreted frizzled-related protein 2                       | ENSSSCG00000009004 | 1.94  | *          | 2.73  | *     | ***           | 0.87                               | $\leq 0.001$ |
| <i>VCAN</i>    | Versican                                                  | ENSSSCG00000014136 | 1.93  | *          | 3.11  | *     | *             | 0.82                               | $\leq 0.001$ |
| <i>NR4A2</i>   | Nuclear receptor subfamily 4, group A, member 2           | ENSSSCG00000015871 | 1.88  | *          | 3.22  | *     | *             |                                    |              |
| <i>CHEK1</i>   | Checkpoint kinase 1                                       | ENSSSCG00000015215 | 1.82  | *          | 2.21  | 0.057 | **            |                                    |              |
| <i>MYZAP</i>   | Myocardial zonula adherens protein                        | ENSSSCG00000004598 | 1.81  | *          | 2.19  | 0.052 | *             |                                    |              |
| <i>LXN</i>     | Latexin                                                   | ENSSSCG00000020984 | 1.80  | *          | 2.19  | *     | ***           |                                    |              |
| <i>COL11A1</i> | Collagen, type XI, alpha 1                                | ENSSSCG00000006857 | 1.78  | 0.051      | 3.43  | *     | *             |                                    |              |
| <i>SSX2IP</i>  | Synovial sarcoma, X breakpoint 2 interacting protein      | ENSSSCG00000003757 | 1.78  | *          | 2.20  | 0.063 | *             |                                    |              |
| <i>FRMD6</i>   | FERM domain containing 6                                  | ENSSSCG00000005027 | 1.74  | *          | 2.09  | 0.064 | **            |                                    |              |
| <i>NUF2</i>    | NDC80 kinetochore complex component                       | ENSSSCG00000006333 | 1.72  | *          | 2.03  | 0.076 | *             |                                    |              |
| <i>KIF23</i>   | Kinesin family member 23                                  | ENSSSCG00000004969 | 1.72  | *          | 1.97  | 0.078 | **            |                                    |              |
| <i>NG</i>      | Similar to transmembrane protein 106C ( <i>TMEM106C</i> ) | ENSSSCG00000028397 | 1.71  | *          | 1.98  | 0.067 | *             |                                    |              |
| <i>DNAH11</i>  | Dynein, axonemal, heavy chain 11                          | ENSSSCG00000015379 | 1.71  | *          | 1.96  | 0.082 | *             |                                    |              |

| Gene            |                                                                  | Ensemble ID        | DESeq |            | edgeR |       | baySeq<br>FDR | Validation qPCR |        |
|-----------------|------------------------------------------------------------------|--------------------|-------|------------|-------|-------|---------------|-----------------|--------|
| symbol          | name                                                             |                    | FC    | Ad p-value | FC    | FDR   |               | r               | P      |
| <i>KIT</i>      | V-kit Hardy-Zuckerman 4 feline sarcoma viral oncogene            | ENSSSCG00000008842 | 1.69  | *          | 1.94  | 0.1   | *             |                 |        |
| <i>ZNF300</i>   | Zinc finger protein 300                                          | ENSSSCG00000021371 | 1.64  | *          | 1.85  | 0.013 | **            |                 |        |
| <i>NG</i>       | Similar to trichoplein, keratin filament binding ( <i>TCHP</i> ) | ENSSSCG00000009926 | 1.64  | *          | 1.85  | 0.086 | *             |                 |        |
| <i>CDH11</i>    | Cadherin 11, type 2, OB-cadherin                                 | ENSSSCG00000002795 | 1.56  | 0.076      | 2.93  | *     | **            |                 |        |
| <i>NG</i>       | Similar to tetratricopeptide repeat domain 21B ( <i>TTC21B</i> ) | ENSSSCG00000015909 | 1.57  | *          | 1.67  | 0.01  | **            |                 |        |
| <i>ALDH1L2</i>  | Aldehyde dehydrogenase 1 family, member L2                       | ENSSSCG00000000839 | 1.57  | **         | 1.65  | 0.066 | *             |                 |        |
| <i>C5orf42</i>  | Chromosome 5 open reading frame 42                               | ENSSSCG00000016843 | 1.55  | *          | 1.67  | 0.17  | *             |                 |        |
| <i>CCDC25</i>   | Coiled-coil domain containing 25                                 | ENSSSCG00000024972 | 1.54  | ***        | 1.59  | 0.052 | **            |                 |        |
| <i>HELQ</i>     | Helicase, POLQ-like                                              | ENSSSCG00000009236 | 1.53  | *          | 1.60  | 0.17  | *             |                 |        |
| <i>CXorf38</i>  | Chromosome X open reading frame                                  | ENSSSCG00000012249 | 1.46  | **         | 1.51  | 0.19  | *             |                 |        |
| <i>ISG15</i>    | ISG15 ubiquitin-like modifier                                    | ENSSSCG00000027982 | -1.13 | 0.073      | -7.71 | *     | ***           |                 |        |
| <i>TRNAUIAP</i> | tRNA selenocysteine 1 associated protein 1                       | ENSSSCG00000030284 | -1.37 | **         | -1.38 | 0.023 | **            |                 |        |
| <i>RGPI</i>     | Retrograde golgi transport homolog                               | ENSSSCG00000005320 | -1.38 | *          | -1.40 | 0.29  | *             |                 |        |
| <i>NG</i>       | Similar to PPFIA binding protein 2 ( PPFIBP2)                    | ENSSSCG00000014598 | -1.41 | *          | -1.43 | 0.26  | *             |                 |        |
| <i>THTPA</i>    | Thiamine triphosphatase                                          | ENSSSCG00000002016 | -1.45 | *          | -1.48 | 0.19  | **            |                 |        |
| <i>NR1H3</i>    | Nuclear receptor subfamily 1, group H, member 3 (LXRA)           | ENSSSCG00000013241 | -1.48 | *          | -1.53 | 0.13  | **            | 0.64            | ≤0.05  |
| <i>MAGIX</i>    | MAGI family member, X-linked                                     | ENSSSCG00000012295 | -1.52 | *          | -1.57 | 0.11  | *             |                 |        |
| <i>NG</i>       | Similar to DnaJ homolog subfamily C member 8 (DNAJC8)            | ENSSSCG00000028809 | -1.54 | **         | -1.58 | 0.052 | **            |                 |        |
| <i>NG</i>       | Similar to dual specificity phosphatase 13 ( DUSP13)             | ENSSSCG00000029128 | -1.55 | *          | -1.65 | 0.17  | *             |                 |        |
| <i>GPX3</i>     | Glutathione peroxidase 3                                         | ENSSSCG00000017092 | -1.57 | 0.022      | -4.07 | *     | ***           | 0.98            | ≤0.001 |
| <i>AP2B1</i>    | Adaptor-related protein complex 2, beta 1 subunit                | ENSSSCG00000024434 | -1.57 | **         | -1.61 | 0.052 | **            |                 |        |
| <i>RNPEPL1</i>  | Arginyl aminopeptidase (aminopeptidase B)-like 1                 | ENSSSCG00000016367 | -1.59 | *          | -1.70 | 0.064 | *             |                 |        |
| <i>KHK</i>      | Ketohexokinase (fructokinase)                                    | ENSSSCG00000008556 | -1.59 | *          | -1.73 | 0.110 | *             |                 |        |
| <i>SLC38A3</i>  | Solute carrier family 38, member 3                               | ENSSSCG00000011397 | -1.60 | *          | -1.73 | 0.086 | **            |                 |        |
| <i>CST6</i>     | Cystatin E/M                                                     | ENSSSCG00000012960 | -1.60 | *          | -1.68 | 0.063 | **            |                 |        |
| <i>NG</i>       | Cathepsin D (CTSD)                                               | ENSSSCG00000026418 | -1.60 | *          | -1.69 | 0.076 | *             |                 |        |

| Gene             |                                                                | Ensemble ID        | DESeq |            | edgeR  |       | baySeq | Validation qPCR |        |
|------------------|----------------------------------------------------------------|--------------------|-------|------------|--------|-------|--------|-----------------|--------|
| symbol           | name                                                           |                    | FC    | Ad p-value | FC     | FDR   | FDR    | r               | P      |
| <i>EXOC7</i>     | Exocyst complex component 7                                    | ENSSSCG00000017190 | -1.66 | **         | -1.77  | *     | **     |                 |        |
| <i>ASS1</i>      | Argininosuccinate synthase 1                                   | ENSSSCG00000005701 | -1.68 | 0.12       | -6.07  | *     | ***    | 0.98            | ≤0.001 |
| <i>LRR30</i>     | Leucine rich repeat containing 30                              | ENSSSCG00000023672 | -1.75 | *          | -2.00  | 0.073 | ***    |                 |        |
| <i>MAOB</i>      | Monoamine oxidase B                                            | ENSSSCG00000023215 | -1.77 | **         | -1.96  | *     | *      |                 |        |
| <i>UCHL1</i>     | Ubiquitin carboxyl-terminal esterase L1                        | ENSSSCG00000022945 | -1.84 | *          | -2.43  | 0.056 | *      | 0.81            | ≤0.01  |
| <i>PEX11G</i>    | Peroxisomal biogenesis factor 11 gamma                         | ENSSSCG00000013569 | -1.86 | **         | -2.07  | *     | ***    | 0.70            | ≤0.01  |
| <i>LIPE</i>      | Lipase, hormone-sensitive (HSL)                                | ENSSSCG00000003018 | -1.87 | *          | -2.51  | *     | **     | 0.57            | ≤0.05  |
| <i>LIMK1</i>     | LIM domain kinase 1                                            | ENSSSCG00000030378 | -1.89 | *          | -2.36  | *     | **     | 0.85            | ≤0.01  |
| <i>OAS2</i>      | Helicase, POLQ-like                                            | ENSSSCG00000009881 | -1.93 | *          | -3.36  | *     | ***    | 0.90            | ≤0.001 |
| <i>HP</i>        | Haptoglobin                                                    | ENSSSCG00000002749 | -2.10 | **         | -11.18 | ***   | ***    | 0.99            | ≤0.001 |
| <i>NG</i>        | Similar to SWI/SNF related, matrix associated, actin dependent | ENSSSCG00000022002 | -2.14 | **         | -2.91  | **    | ***    |                 |        |
| <i>APOD</i>      | Apolipoprotein D                                               | ENSSSCG00000011831 | -2.26 | ***        | -2.67  | ***   | ***    | 0.89            | ≤0.001 |
| <i>SEPT6-007</i> | 6-isoform of septin 6                                          | ENSSSCT00000013798 | -1.95 | **         | -2.24  | **    | ***    |                 |        |

Abbreviation: Ad *P*-value - adjusted *P*-value, FDR- false discovery rate; rate of type I errors, FC- fold change, PL –Polish Landrace pigs, NG – novel gene according to Ensembl browser

<sup>1</sup>The Pearson Correlation Coefficients had *P*-value at least <0.05, *P*-values of DESeq, edgeR and baySeq methods\*\*\**P*<0.001, \*\**P*<0.01, \**P*<0.05.
