# Supplementary material for: A comprehensive transcriptome analysis of skeletal muscles in two Polish pig breeds differing in fat and meat quality traits
Source: PubMed Central journal article supplement (PMC5901489; doi:10.1590/1678-4685-gmb-2016-0101), 2018
Supplement: 1415-4757-GMB-41-01-2016-0101-s004.pdf [file 1415-4757-GMB-41-01-2016-0101-s004.pdf]

## Supplementary Material to “A comprehensive transcriptome analysis of skeletal muscles in two Polish pig breeds differing in fat and meat quality traits”

Table S4 - Pearson correlation coefficient r between FPKMs of DEGs in *longissimus dorsi* and pig production traits.

| Trait                               | Differentially expressed genes |                |             |             |             |               |              |             |             |              |               |                |           |                |               |                |             |
|-------------------------------------|--------------------------------|----------------|-------------|-------------|-------------|---------------|--------------|-------------|-------------|--------------|---------------|----------------|-----------|----------------|---------------|----------------|-------------|
|                                     | <i>ASS1</i>                    | <i>UCLH1</i>   | <i>LIPE</i> | <i>HES1</i> | <i>LXRA</i> | <i>MAOB</i>   | <i>SCRF2</i> | <i>VCAN</i> | <i>APOD</i> | <i>LIMK1</i> | <i>PEX11G</i> | <i>PPP11R1</i> | <i>HP</i> | <i>OAS2</i>    | <i>PVALB</i>  | <i>CNN1</i>    | <i>GPX3</i> |
| <b>Fattening traits</b>             |                                |                |             |             |             |               |              |             |             |              |               |                |           |                |               |                |             |
| age at slaughter (day)              | 0.49                           | <u>0.70**</u>  | 0.05        | -0.19       | 0.51*       | 0.57*         | 0.01         | -0.16       | 0.19        | 0.53*        | 0.49*         | -0.32          | 0.43      | <u>-0.67**</u> | -0.34         | -0.45          | 0.28        |
| daily gain (g/kg)                   | -0.41                          | -0.58*         | -0.39       | 0.01        | -0.41       | -0.61*        | 0.26         | 0.49        | -0.18       | -0.40        | -0.56*        | <u>0.80***</u> | -0.35     | -0.54*         | 0.54*         | <u>0.68**</u>  | -0.24       |
| feed gain ration (g/day)            | 0.40                           | 0.47           | 0.29        | -0.12       | 0.41        | <u>0.69**</u> | -0.31        | -0.57*      | 0.02        | 0.32         | 0.45          | -0.63**        | 0.18      | 0.44           | -0.46         | -0.47          | 0.05        |
| feed intake (kg)                    | 0.62*                          | 0.54*          | 0.34        | -0.07       | 0.32        | <u>0.66**</u> | -0.30        | -0.49       | -0.01       | 0.57*        | 0.43          | -0.59*         | 0.23      | 0.48           | -0.56*        | -0.48          | 0.02        |
| <b>Slaughter traits</b>             |                                |                |             |             |             |               |              |             |             |              |               |                |           |                |               |                |             |
| weight of loin (kg)                 | 0.05                           | -0.03          | -0.41       | 0.03        | -0.23       | -0.26         | 0.21         | 0.51        | -0.14       | 0.16         | -0.19         | 0.57*          | -0.15     | -0.01          | 0.08          | 0.29           | -0.17       |
| backfat thickness (cm)              | 0.57*                          | 0.31           | 0.55*       | 0.30        | 0.18        | 0.28          | -0.09        | -0.21       | 0.27        | 0.35         | 0.37          | -0.44          | 0.44      | 0.40           | -0.53*        | -0.43          | 0.29        |
| loin eye area (cm <sup>2</sup> )    | -0.41                          | -0.2           | -0.49       | -0.24       | -0.25       | -0.27         | 0.22         | 0.57*       | -0.19       | -0.27        | -0.27         | 0.28           | -0.38     | -0.19          | 0.06          | 0.27           | -0.26       |
| meat percentage (%)                 | -0.63*                         | -0.39          | -0.55*      | -0.24       | -0.45       | -0.51*        | 0.05         | 0.07        | -0.41       | -0.33        | -0.53*        | 0.35           | -0.51*    | -0.31          | 0.58*         | 0.39           | -0.39       |
| <b>Longissimus dorsi</b>            |                                |                |             |             |             |               |              |             |             |              |               |                |           |                |               |                |             |
| meat exudation                      | -0.21                          | <u>-0.66**</u> | -0.30       | 0.49        | -0.42       | -0.61*        | 0.18         | 0.46        | -0.28       | -0.37        | -0.57*        | <u>0.82***</u> | -0.41     | -0.55*         | 0.45          | <u>0.82***</u> | -0.26       |
| meat redness (MA)                   | -0.28                          | -0.30          | -0.13       | 0.31        | -0.23       | -0.23         | 0.25         | 0.40        | 0.11        | -0.50*       | -0.09         | 0.42           | -0.19     | -0.21          | 0.38          | 0.50*          | -0.02       |
| Intramuscular fat (%)               | 0.48                           | 0.07           | 0.61**      | 0.35        | 0.21        | 0.21          | -0.01        | -0.07       | 0.23        | 0.13         | 0.20          | -0.27          | 0.28      | 0.01           | -0.37         | -0.18          | 0.22        |
| firmness<br>by Warner-Bratzler (N)  | -0.36                          | -0.64**        | -0.41       | 0.37        | -0.38       | -0.61*        | 0.24         | 0.46        | -0.32       | -0.41        | -0.59*        | <u>0.76***</u> | -0.47     | -0.63**        | <u>0.71**</u> | <u>0.88***</u> | -0.32       |
| toughness<br>by Warner-Bratzler (N) | -0.29                          | -0.61*         | -0.31       | 0.41        | -0.41       | -0.60*        | 0.21         | 0.41        | -0.30       | -0.38        | -0.61*        | <u>0.77***</u> | -0.45     | -0.60*         | <u>0.68**</u> | <u>0.83***</u> | -0.30       |
| harness by TPA (N)                  | -0.49                          | -0.53*         | -0.17       | 0.06        | -0.25       | -0.39         | -0.21        | -0.11       | -0.34       | -0.10        | -0.52*        | -0.10          | -0.28     | <u>-0.66**</u> | 0.28          | 0.16           | -0.29       |

\* -  $P \leq 0.05$ ; \*\* -  $P \leq 0.01$ , \*\*\* -  $P \leq 0.001$ , underlined values were significant after Bonferroni correction. The transcript levels of DEGs were showed as normalized FPKM values.
