# Supplementary material for: A comprehensive transcriptome analysis of skeletal muscles in two Polish pig breeds differing in fat and meat quality traits
Source: PubMed Central journal article supplement (PMC5901489; doi:10.1590/1678-4685-gmb-2016-0101), 2018
Supplement: 1415-4757-GMB-41-01-2016-0101-s005.pdf [file 1415-4757-GMB-41-01-2016-0101-s005.pdf]

### Supplementary Material to “A comprehensive transcriptome analysis of skeletal muscles in two Polish pig breeds differing in fat and meat quality traits”

**Table S5** - Correlation coefficient r between FPKMs of DEGs in *semimembranosus* and pig production traits.

| Trait                       | Differentially expressed genes |        |       |        |        |               |        |        |                |                |         |                 |                |                |       |         |                |
|-----------------------------|--------------------------------|--------|-------|--------|--------|---------------|--------|--------|----------------|----------------|---------|-----------------|----------------|----------------|-------|---------|----------------|
|                             | ASS1                           | UCLH1  | LIPE  | HES1   | LXRA   | MAOB          | SCRF2  | VCAN   | APOD           | LIMK1          | PEX11G  | PPP11R1         | HP             | OAS2           | PVALB | CNN1    | GPX3           |
| <b>Fattening traits</b>     |                                |        |       |        |        |               |        |        |                |                |         |                 |                |                |       |         |                |
| age at slaughter            | <u>0.69**</u>                  | 0.22   | 0.23  | -0.40  | 0.35   | 0.43          | -0.33  | -0.16  | <u>0.80***</u> | 0.26           | 0.40    | -0.32           | <u>0.75***</u> | <u>-0.67**</u> | -0.36 | -0.31   | <u>0.76***</u> |
| daily gain (g/kg)           | -0.49                          | 0.31   | -0.49 | 0.63** | -0.38  | -0.51*        | 0.42   | 0.57*  | -0.54*         | -0.53*         | -0.57*  | <u>0.85***</u>  | -0.35          | -0.54*         | 0.52* | 0.70**  | -0.53*         |
| feed gain ration (g/day)    | 0.55*                          | 0.33   | 0.32  | -0.51* | 0.23   | 0.54*         | -0.46  | -0.59* | 0.46           | 0.41           | 0.52*   | <u>-0.76***</u> | 0.19           | 0.44           | -0.31 | -0.62** | 0.54*          |
| feed intake (kg)            | 0.48                           | 0.24   | 0.28  | -0.51* | 0.15   | <u>0.66**</u> | -0.51* | -0.55* | 0.53*          | 0.56*          | 0.46    | <u>-0.72**</u>  | 0.35           | 0.49           | -0.36 | -0.46   | 0.50*          |
| <b>Slaughter traits</b>     |                                |        |       |        |        |               |        |        |                |                |         |                 |                |                |       |         |                |
| weight of ham (kg)          | -0.43                          | -0.59* | -0.39 | 0.36   | -0.54* | -0.16         | 0.33   | 0.46   | -0.23          | -0.18          | -0.63** | 0.38            | -0.30          | 0.23           | 0.26  | 0.61*   | -0.31          |
| Meat percentage (%)         | -0.29                          | -0.42  | -0.32 | 0.36   | -0.41  | -0.53*        | 0.53*  | 0.55*  | -0.40          | <u>-0.68**</u> | -0.58*  | 0.40            | -0.19          | -0.11          | 0.41  | 0.25    | -0.27          |
| <b>Semimembranosus</b>      |                                |        |       |        |        |               |        |        |                |                |         |                 |                |                |       |         |                |
| firmness by Warner-Bratzler | -0.15                          | -0.08  | 0     | 0.49   | -0.11  | -0.34         | 0.60*  | 0.35   | -0.24          | -0.31          | -0.22   | 0.44            | -0.22          | -0.09          | 0.26  | 0.24    | -0.12          |
| harness by TPA              | 0                              | -0.21  | 0.49  | 0.43   | 0.50   | -0.23         | -0.07  | -0.11  | 0.11           | 0.12           | 0.28    | 0.55*           | 0.26           | -0.10          | -0.01 | 0.15    | -0.03          |
| pH24                        | -0.34                          | -0.15  | 0.17  | 0.30   | -0.02  | -0.28         | -0.10  | -0.32  | -0.65**        | 0.27           | 0.04    | 0.05            | <u>-0.70**</u> | <u>-0.69**</u> | 0.04  | 0.15    | -0.46          |

\*-  $P \leq 0.05$ ; \*\*-  $P \leq 0.01$ , \*\*\*-  $P \leq 0.001$ . underlined values were significant after Bonferroni correction. In additional LIPE gene although it was not validated by qPCR was correlated with pig traits. The transcript levels were showed as normalized FPKM values.
